# Supplementary material for: Enhancement of carbon monoxide concentration in atmosphere due to large scale forest fire of Uttarakhand
Source: PeerJ. 2019 Apr 5;7:e6507. doi: 10.7717/peerj.6507 (PMC6452848; doi:10.7717/peerj.6507)
Supplement: Supplemental Information 1 [file peerj-07-6507-s001.xlsx]

## Sheet: Sheet1
		Texeira, 2013
		CO columnar concentration
		2016	Avg (2011-2015)				1.33518e+18
	2017-04-23	1.4173e+18	1.31297e+18
	2017-04-24	1.55205e+18	1.39068e+18				1.92683e+18
	2017-04-25	1.51291e+18	1.38431e+18
	2017-04-26	1.96051e+18	1.29697e+18
	2017-04-27	2.01941e+18	1.39563e+18				0.443126
	2017-04-28	2.07831e+18	1.38177e+18
	2017-04-29	2.24217e+18	1.29183e+18
	2017-04-30	2.35992e+18	1.22272e+18
	2017-05-01	1.9603e+18	1.42631e+18
	2017-05-02	2.16546e+18	1.24862e+18
		2016
	2018-04-14	1.51194e+18		1.50989e+18		0.276145
	2018-04-15	1.49101e+18
	2018-04-16	1.54466e+18
	2018-04-17	1.57468e+18
	2018-04-18	1.17441e+18
	2018-04-19	1.41536e+18
	2018-04-20	1.91656e+18
	2018-04-21	1.48601e+18
	2018-04-22	1.47433e+18
	2016	No.of fire counts
	2017-04-24	131
	2017-04-25	127
	2017-04-26	291
	2017-04-27	282
	2017-04-28	221
	2017-04-29	221
	2017-04-30	130
	2017-05-01	108
	2017-05-02	82
