# Supplementary material for: Enhancement of carbon monoxide concentration in atmosphere due to large scale forest fire of Uttarakhand
Source: PeerJ. 2019 Apr 5;7:e6507. doi: 10.7717/peerj.6507 (PMC6452848; doi:10.7717/peerj.6507)
Supplement: Supplemental Information 2 [file peerj-07-6507-s002.xlsx]

## Sheet: Sheet1
		FLEXPART output					AIRS profile
	Pressure level (hPa)	Mean	Standard Deviation			Pressure level(hPa)	Mean	Standard Deviation
	683	334726	186186			700	158670	44055.2
	641	207636	142426			600	138782	35663.6
	601	144088	119084			500	114951	26359.9
	562	94483.5	91218.6			400	100840	22646.9
	526	60400.7	66586.2			300	85331.5	15317.7
	492	43561.3	58810.7			250	68673.9	11061.7
	459	35977.4	53767.6
	428	40055.7	60147
	399	51784.8	86116.5
	372	44513.7	69878.6
	346	31962.6	57392.8
	321	13956.5	22713.6
	298	5686.31	10477.3
	277	3599.6	7482.2
	256	2450.39	5198.17
