# Supplementary material for: Enhancement of carbon monoxide concentration in atmosphere due to large scale forest fire of Uttarakhand
Source: PeerJ. 2019 Apr 5;7:e6507. doi: 10.7717/peerj.6507 (PMC6452848; doi:10.7717/peerj.6507)
Supplement: Supplemental Information 3 [file peerj-07-6507-s003.xlsx]

## Sheet: Sheet1
Dates	FLEXPART	AIRS columnar
2018-04-24	7.91407e+08	1.55e+18
2018-04-25	1.32013e+09	1.51e+18
2018-04-26	2.29183e+09	1.96e+18
2018-04-28	2.88716e+09	2.08e+18
2018-04-29	2.59253e+09	2.24e+18
2018-04-30	4.11795e+09	2.36e+18
2018-05-01	2.8853e+09	1.96e+18
2018-05-02	2.68276e+09	2.17e+18
