# Supplementary material for: Enhancement of carbon monoxide concentration in atmosphere due to large scale forest fire of Uttarakhand
Source: PeerJ. 2019 Apr 5;7:e6507. doi: 10.7717/peerj.6507 (PMC6452848; doi:10.7717/peerj.6507)
Supplement: Supplemental Information 4 [file peerj-07-6507-s004.xlsx]

## Sheet: uk
				Outputs from FLEXPART at different altitudes over Uttarakhand
				500	1000	1500	2000	2500	3000	3500	4000	4500	5000	5500	6000	6500	7000	7500	8000	8500
			24/04/2016:09:00	2.76051e+06	336375	154112	85888.4	58978.9	36654.4	21013.8	10642.3	3414.76	975.295	305.688	64.9735	27.3128	3.94245	3.35732	1.31631	0.00931187
			25/04/2016:09:00	4.70041e+06	601896	262651	134780	82346.6	45560.5	21669.8	10086.1	4673.82	2336.99	932.881	366.365	124.7	38.6301	2.74583	2.67329	0
			25/04/2016:09:00	7.50259e+06	1.06783e+06	529252	293332	169225	87038.1	35879.3	7830.43	862.634	128.55	19.2519	1.07687	0	0	0	0	0
			27/04/2016:09:00	8.49048e+06	1.7894e+06	976481	557416	336246	200728	110014	50807.4	14311.2	1244.23	115.433	7.20386	1.02269	0	0	0	0.588322
			28/04/2016:09:00	7.76315e+06	1.51258e+06	683189	328884	193663	123822	73467.8	38832.9	9794.95	861.767	123.302	20.6677	2.38714	0	0	0	0
			29/04/2016:09:00	7.20819e+06	1.52834e+06	731305	326537	157114	80088.2	44934.2	30510.6	38740	38025.8	21815	6469.78	1470.4	339.96	96.0405	0	0
			30/04/2016:09:00	8.39922e+06	1.84049e+06	1.06715e+06	797797	678501	580083	503887	435642	357161	274644	216675	195277	120542	57649.6	34836.4	21690.7	12457.2
			01/04/2016:09:00	5.31031e+06	2.17711e+06	1.21197e+06	763064	502321	234481	124671	84961.5	61386.7	65866.1	106585	94267.6	43239.3	16164	4671.7	1955.02	1223.35
			02/04/2016:09:00	4.43339e+06	2.20321e+06	1.53373e+06	1.14232e+06	913376	641554	313231	173115	122245	133751	158947	203640	342638	112240	6676.73	1091.15	194.98
			03/04/2016:09:00	1.73734e+06	728573	563983	424479	289848	176577	100130	44026.8	20671	16849.4	12574	9683.19	6441.27	4382.07	2505.82	1338.98	606.699
				Outputs from FLEXPART at different altitudes over Tibet
				500	1000	1500	2000	2500	3000	3500	4000	4500	5000	5500	6000	6500	7000	7500	8000	8500
			24/04/2016:09:00	0	0	0	0	0	0	0	0	0	0	0	0.0778631	0.0417332	5.95008	11.6579	24.6387	30.0955
			25/04/2016:09:00	647.394	4472.81	15160.7	11289.7	6265.17	4152.17	3510.66	3233.84	2157.62	1212.03	697.693	675.353	748.191	715.916	528.053	243.336	155.862
			26/04/2016:09:00	165248	11744.3	10254.6	8954.05	9995.71	14513.8	27870.1	55911.3	64202.2	35999.4	8160.64	675.464	126.23	61.282	21.9433	45.9075	34.6414
			27/04/2016:09:00	313580	59657.3	68087.7	70482.6	68091.6	61127.1	53697	64453.9	94834.3	89360	80675.3	37237.7	5615.51	1714.5	667.978	40.9051	16.2367
			28/04/2016:09:00	737457	34982.4	50500.7	57976.9	63965	80527.5	85444.3	57281	23939.5	11648	6660.01	5140.58	4646.54	4774.25	4809.36	3496.9	1679
			29/04/2016:09:00	1.02269e+06	96202.8	144446	176289	139053	85347.6	57295.8	40128.9	24285.5	17408	14438.4	12676.5	9309.13	5146.37	3015.35	542.75	164.999
			30/04/2016:09:00	701637	444711	367144	274142	218773	194675	102064	49885.2	52136.8	50100.8	26220.6	10734	7370.32	6744.13	5302.21	1131.14	396.33
			01/04/2016:09:00	1.49548e+06	131458	117258	133182	177331	299157	257886	155241	117321	99098.7	66490.6	34985.2	17099.2	7998.5	5218.62	4036.19	1592.15
			02/04/2016:09:00	48.1337	0.012975	0	0	0	0	0	0.505927	29.3266	272.28	1934.53	10539.6	12022.8	7941.74	2977.72	1277.73	675.253
			03/04/2016:09:00	0.154812	0	0	1.84167	3.59102	11.2739	58.2113	191.144	733.09	1486.37	2897.38	3996.09	7586.12	8314.13	8303.37	9719.25	4092.28
